# Supplementary material for: PtCu Nanoparticle Catalyst for Electrocatalytic Glycerol Oxidation: How Does the PtCu Affect to Glycerol Oxidation Reaction Performance by Changing pH Conditions?
Source: MDPI journal article supplement (doi:10.3390/catal13050892), 2023-05-15
Supplement: s1 [file s1]

## Supporting Information

### **PtCu Nanoparticle Catalyst for Electrocatalytic Glycerol Oxidation: How Does the PtCu Affect to Glycerol Oxidation Reaction Performance by Changing pH Conditions?**

Lee Seul Oh <sup>1,2</sup>, Jeonghyun Han <sup>3</sup>, Eunho Lim <sup>1</sup>, Won Bae Kim <sup>3,\*</sup> and Hyung Ju Kim <sup>1,4,\*</sup>

<sup>1</sup> Chemical & Process Technology Division, Korea Research Institute of Chemical Technology (KRICT), 141 Gajeong-ro, Yuseong-gu, Daejeon 34114, Republic of Korea; seul1030@kRICT.re.kr (LSO); eunho-lim@kRICT.re.kr (EL); hjkim@kRICT.re.kr (HJK)

<sup>2</sup> Department of Chemical and Biomolecular Engineering, Yonsei University, 50 Yonsei-ro, Seodaemun-gu, Seoul 03722, Republic of Korea

<sup>3</sup> Department of Chemical Engineering Pohang University of Science and Technology (POSTECH), 77 Cheongam-ro, Nam-gu, Pohang-si, Gyeongsangbuk-do 37673, Republic of Korea; hjhyeon95@postech.ac.kr (JH); kimwb@postech.ac.kr (WBK)

<sup>4</sup> Advanced Materials and Chemical Engineering, University of Science and Technology (UST), 113 Gwahangno, Yuseong-gu, Daejeon 34113, Republic of Korea

\* Correspondence: kimwb@postech.ac.kr (WBK); hjkim@kRICT.re.kr (HJK)

**Keywords:** electrocatalytic glycerol oxidation; PtCu electrocatalyst; pH condition change; catalytic activity enhancement; reaction pathway control

#### **Table of contents:**

1. LSV curves of the Pt/C and PtCu/C with increasing pH
2. Comparison of the Tafel slope with increasing pH
3. Comparison table of EGOR performances using Pt-based catalysts

# LSV curves of the Pt/C and PtCu/C with increasing pH

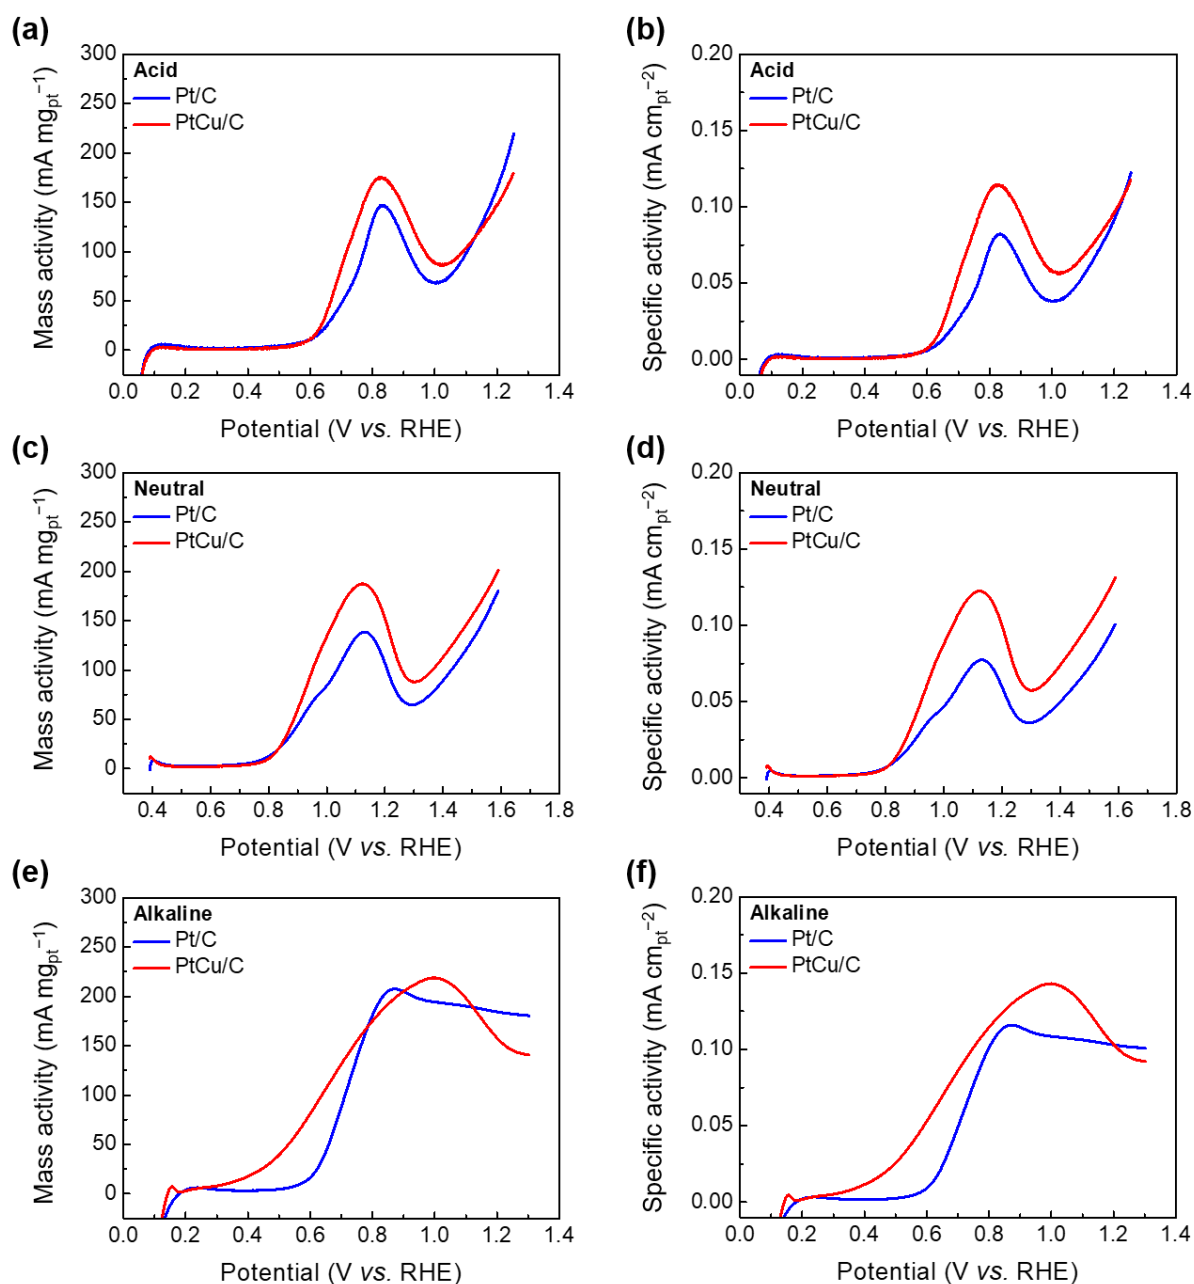

**Figure S1.** LSV curves of the Pt/C and PtCu/C catalysts in 1 M glycerol (a,b) with 0.5 M H<sub>2</sub>SO<sub>4</sub>, (c,d) with 0.1 M Na<sub>2</sub>SO<sub>4</sub>, and (e,f) with 0.1 M KOH electrolyte (scan rate: 5 mV s<sup>-1</sup> at room temperature). Figures (a,c,e) represent mass activity and Figures (b,d,f) show specific activity, respectively.

## Comparison of the Tafel slope with increasing pH

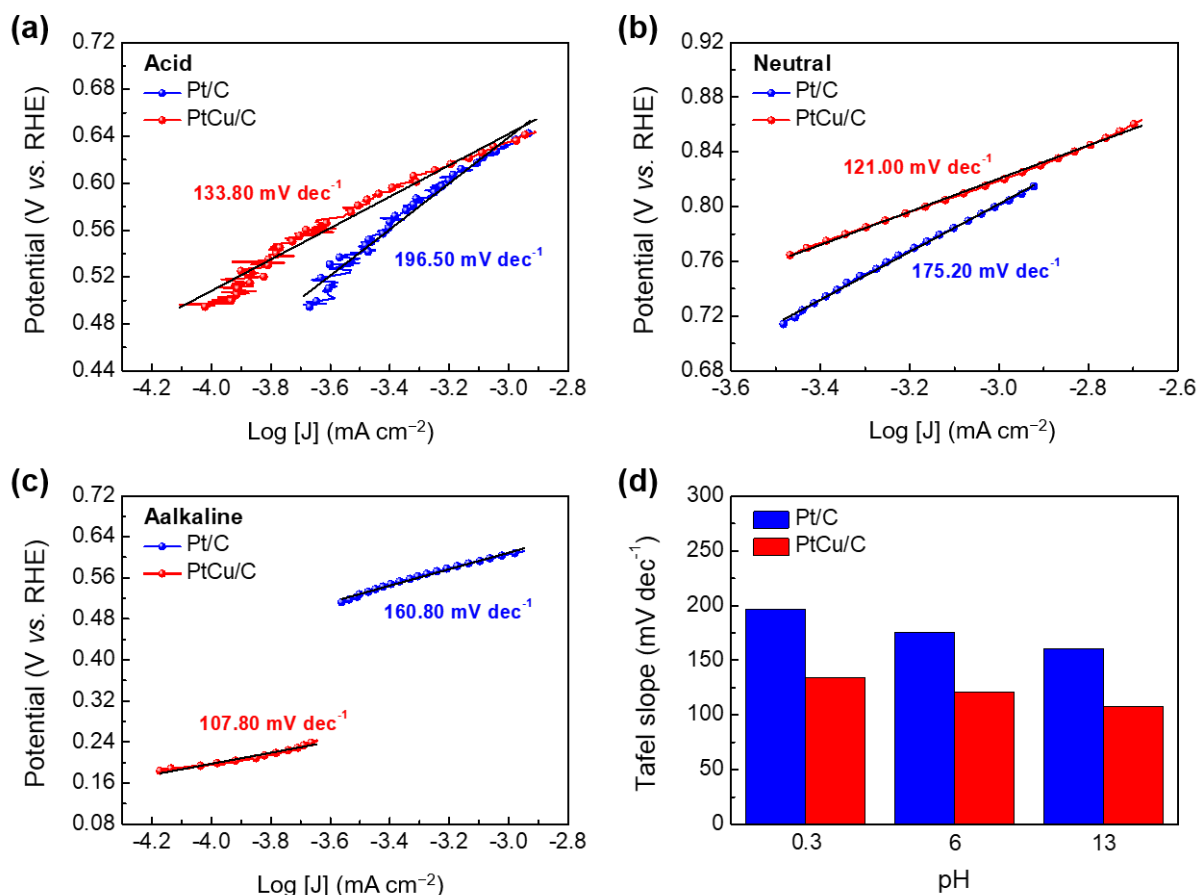

**Figure S2.** Tafel plot of the Pt/C and PtCu/C catalysts in 1 M glycerol with (a) 0.5 M H<sub>2</sub>SO<sub>4</sub> (acid), (b) 0.1 M Na<sub>2</sub>SO<sub>4</sub> (neutral), and (c) 0.1 M KOH (alkaline). (d) Comparison of the Tafel slope with increasing pH.

## Comparison table of EGOR performances using Pt-based catalysts

**Table S1.** Comparison table of EGOR performances using Pt-based catalysts.

| Catalyst                                        | Feed Solution                                         | Scan Rate<br>(mV s <sup>-1</sup> ) | Electrocatalytic Glycerol Oxidation                                |                                                                        | Ref.      |
|-------------------------------------------------|-------------------------------------------------------|------------------------------------|--------------------------------------------------------------------|------------------------------------------------------------------------|-----------|
|                                                 |                                                       |                                    | Mass Activity<br>(mA mg <sub>Pt</sub> <sup>-1</sup> ) <sup>a</sup> | Specific Activity<br>(mA cm <sub>Pt</sub> <sup>-1</sup> ) <sup>b</sup> |           |
| PtRuSn/C                                        | 2 M glycerol + 0.5 M H <sub>2</sub> SO <sub>4</sub>   | 50                                 | 253.2                                                              | -                                                                      | [1]       |
| Pt <sub>0.85</sub> Cu <sub>0.15</sub> -CuO(3)/C | 0.1 M glycerol+ 0.1 M NaOH                            | 50                                 | 270                                                                | -                                                                      | [2]       |
| Co@Pt/CCE                                       | 0.5 M glycerol + 0.5 M H <sub>2</sub> SO <sub>4</sub> | 50                                 | -                                                                  | 0.25                                                                   | [3]       |
| PtAu@Ag                                         | 1 M glycerol + 0.1 M HClO <sub>4</sub>                | 10                                 | -                                                                  | 0.27                                                                   | [4]       |
| Pt/3D-GLC                                       | 2 M glycerol + 0.5 M H <sub>2</sub> SO <sub>4</sub>   | 50                                 | 178.2                                                              | -                                                                      | [5]       |
| ALD(TiO <sub>2</sub> )-Pt/C(150HT)              | 2 M glycerol + 0.5 M H <sub>2</sub> SO <sub>4</sub>   | 50                                 | 186                                                                | 0.25                                                                   | [6]       |
| Sn@Pt/C                                         | 0.5 M glycerol + 0.5 M H <sub>2</sub> SO <sub>4</sub> | 20                                 | 56                                                                 | -                                                                      | [7]       |
| Rh@Pt/C                                         | 0.5 M glycerol + 0.5 M H <sub>2</sub> SO <sub>4</sub> | 20                                 | 93                                                                 | -                                                                      |           |
| 75ALD(SnO <sub>2</sub> )-Pt/C(HT)               | 2 M glycerol + 0.5 M H <sub>2</sub> SO <sub>4</sub>   | 50                                 | -                                                                  | 0.43                                                                   | [8]       |
| Pt nanoflowers                                  | 1 M glycerol + 0.5 M H <sub>2</sub> SO <sub>4</sub>   | 50                                 | 180                                                                | 0.32                                                                   | [9]       |
| PtNi/C                                          | 2 M glycerol + 0.5 M H <sub>2</sub> SO <sub>4</sub>   | 50                                 | 204                                                                | 0.27                                                                   | [10]      |
| PtCu/C                                          | 1 M glycerol + 0.5 M H <sub>2</sub> SO <sub>4</sub>   | 50                                 | 156.20                                                             | 0.34                                                                   | This work |
|                                                 | 1 M glycerol+ 0.1 M Na <sub>2</sub> SO <sub>4</sub>   | 50                                 | 163.20                                                             | 0.36                                                                   |           |
|                                                 | 1 M glycerol+ 0.1 M KOH                               | 50                                 | 199.80                                                             | 0.44                                                                   |           |

## References

1. Kim, H.J.; Choi, S.M.; Green, S.; Tompsett, G.A.; Lee, S.H.; Huber, G.W.; Kim, W.B. Highly active and stable PtRuSn/C catalyst for electrooxidations of ethylene glycol and glycerol. *Appl. Catal. B* **2011**, *101*, 366-375, doi:10.1016/j.apcatb.2010.10.005.
2. Sieben, J.M.; Alvarez, A.E.; Sanchez, M.D. Glycerol electrooxidation on carbon-supported Pt-CuO and PtCu-CuO catalysts. *Electrochim. Acta* **2023**, *439*, doi:10.1016/j.electacta.2022.141672.
3. Habibi, B.; Ghaderi, S. Synthesis, characterization and electrocatalytic activity of Co@Pt nanoparticles supported on carbon-ceramic substrate for fuel cell applications. *Int. J. Hydrog. Energy* **2015**, *40*, 5115-5125, doi:10.1016/j.ijhydene.2015.02.103.
4. Zhou, Y.; Shen, Y.; Xi, J. Seed-mediated synthesis of PtxAu<sub>y</sub>@Ag electrocatalysts for the selective oxidation of glycerol. *Appl. Catal. B* **2019**, *245*, 604-612, doi:10.1016/j.apcatb.2019.01.009.
5. Lee, D.; Kim, Y.; Kwon, Y.; Lee, J.; Kim, T.-W.; Noh, Y.; Kim, W.B.; Seo, M.H.; Kim, K.; Kim, H.J. Boosting the electrocatalytic glycerol oxidation performance with highly-dispersed Pt nanoclusters loaded on 3D graphene-like microporous carbon. *Appl. Catal. B* **2019**, *245*, 555-568, doi:10.1016/j.apcatb.2019.01.022.
6. Han, J.; Kim, Y.; Jackson, D.H.K.; Chang, H.; Kim, H.W.; Lee, J.; Kim, J.-R.; Noh, Y.; Kim, W.B.; Lee, K.-Y.; et al. Enhanced catalytic performance and changed reaction chemistry for electrochemical glycerol oxidation by atomic-layer-deposited Pt-nanoparticle catalysts. *Appl. Catal. B* **2020**, *273*, doi:10.1016/j.apcatb.2020.119037.
7. Pupo, M.M.S.; López-Suárez, F.E.; Bueno-López, A.; Meneses, C.T.; Eguiluz, K.I.B.; Salazar-Banda, G.R. Sn@Pt and Rh@Pt core-shell nanoparticles synthesis for glycerol oxidation. *J Appl Electrochem* **2014**, *45*, 139-150, doi:10.1007/s10800-014-0757-0.
8. Lee, D.; Kim, Y.; Han, H.; Kim, W.B.; Chang, H.; Chung, T.-M.; Han, J.H.; Kim, H.W.; Kim, H.J. Atomic-layer-deposited SnO<sub>2</sub> on Pt/C prevents sintering of Pt nanoparticles and affects the reaction chemistry for the electrocatalytic glycerol oxidation reaction. *J. Mater. Chem. A* **2020**, *8*, 15992-16005, doi:10.1039/d0ta02509g.
9. Zuo, Y.; Wu, L.; Cai, K.; Li, T.; Yin, W.; Li, D.; Li, N.; Liu, J.; Han, H. Platinum Dendritic-Flowers Prepared by Tellurium Nanowires Exhibit High Electrocatalytic Activity for Glycerol Oxidation. *ACS Appl. Mater. Interfaces* **2015**, *7*, 17725-17730, doi:10.1021/acsami.5b03826.
10. Lee, S.; Kim, H.J.; Choi, S.M.; Seo, M.H.; Kim, W.B. The promotional effect of Ni on bimetallic PtNi/C catalysts for glycerol electrooxidation. *APPL CATAL A-GEN* **2012**, *429-430*, 39-47, doi:10.1016/j.apcata.2012.04.002.
